# Supplementary material for: Genome-Wide Analyses of MADS-Box Genes in Humulus lupulus L. Reveal Potential Participation in Plant Development, Floral Architecture, and Lupulin Gland Metabolism
Source: MDPI journal article supplement (doi:10.3390/plants11091237), 2022-05-03
Supplement: s1 [file s1]

**Table S1.** *MADS-box* gene identified in the hop genome.

| Gene ID               | Gene name | Contig Location         | CDS (bp) | Exon No. | Strand | Protein size (residues) | MW (Da)  | pI    | Subfamily  |
|-----------------------|-----------|-------------------------|----------|----------|--------|-------------------------|----------|-------|------------|
| <b>g126639.t1</b>     | HIMADS01  | 005050F:261365:267689   | 648      | 7        | -      | 215                     | 24191.15 | 8.66  | AGL12      |
| <b>g4287.t1</b>       | HIMADS02  | 000025F:2663950:2669377 | 747      | 9        | -      | 248                     | 28673.47 | 8.96  | E(SEP)     |
| <b>000727F.g16.t1</b> | HIMADS03  | 000727F:300503:306308   | 732      | 8        | +      | 243                     | 28010.83 | 8.78  | E(SEP)     |
| <b>000079F.g81.t1</b> | HIMADS04  | 000079F:2009261:2019723 | 780      | 8        | +      | 259                     | 29495.61 | 7.57  | E(SEP)     |
| <b>001022F.g25.t2</b> | HIMADS05  | 001022F:835353:848110   | 897      | 9        | -      | 298                     | 34337.21 | 7.57  | E(SEP)     |
| <b>006765F.g2.t1</b>  | HIMADS06  | 006765F:49016:57362     | 567      | 7        | +      | 188                     | 22130.51 | 9.68  | E(SEP)     |
| <b>000139F.g16.t1</b> | HIMADS07  | 000139F:691180:701232   | 843      | 8        | -      | 262                     | 30480.39 | 8.73  | AGL6       |
| <b>000261F.g24.t1</b> | HIMADS08  | 000261F:1206883:1217085 | 729      | 8        | +      | 242                     | 28455.11 | 8.87  | AGL6       |
| <b>000155F.g57.t2</b> | HIMADS09  | 000155F:1174916:1179017 | 828      | 9        | -      | 156                     | 17770.36 | 9.45  | TM8        |
| <b>004947F.g24.t1</b> | HIMADS10  | 004947F:296392:297739   | 477      | 4        | +      | 129                     | 14846.84 | 9.37  | TM8        |
| <b>006412F.g5.t1</b>  | HIMADS11  | 006412F:101506:107824   | 774      | 8        | +      | 257                     | 29984.02 | 8.2   | A(AP1-FUL) |
| <b>005516F.g3.t1</b>  | HIMADS12  | 005516F:100575:106871   | 771      | 8        | -      | 256                     | 29778.06 | 8.97  | A(AP1-FUL) |
| <b>000562F.g29.t1</b> | HIMADS13  | 000562F:405065:407961   | 930      | 7        | -      | 295                     | 33152.62 | 6.55  | B(AP3-PI)  |
| <b>000267F.g44.t1</b> | HIMADS14  | 000267F:1322662:1327001 | 1026     | 11       | +      | 341                     | 38315.62 | 6.26  | MIKC*      |
| <b>000006F.g39.t2</b> | HIMADS15  | 000006F:1630741:1633244 | 654      | 5        | +      | 225                     | 25689.19 | 7.07  | BS(TT16)   |
| <b>008535F.g2.t2</b>  | HIMADS16  | 008535F:35736:40789     | 628      | 9        | +      | 208                     | 23976.43 | 6.55  | SVP        |
| <b>003895F.g10.t1</b> | HIMADS17  | 003895F:119273:124319   | 588      | 7        | -      | 195                     | 22415.69 | 6.86  | SVP        |
| <b>004012F.g22.t2</b> | HIMADS18  | 004012F:362046:365098   | 519      | 8        | +      | 152                     | 17407.84 | 9.3   | TM8        |
| <b>002163F.g38.t1</b> | HIMADS19  | 002163F:484371:488562   | 765      | 9        | -      | 254                     | 28867.72 | 8.23  | AGL15      |
| <b>g128133.t1</b>     | HIMADS20  | 005238F:252962:256110   | 597      | 8        | -      | 254                     | 28872.72 | 8.24  | AGL15      |
| <b>004180F.g12.t1</b> | HIMADS21  | 004180F:187393:188704   | 1140     | 1        | +      | 379                     | 42912.16 | 6.83  | Beta       |
| <b>000351F.g15.t1</b> | HIMADS22  | 000351F:597580:601145   | 1062     | 13       | +      | 353                     | 40110.17 | 6.61  | MIKC*      |
| <b>000962F.g16.t1</b> | HIMADS23  | 000962F:609956:612029   | 603      | 3        | +      | 200                     | 22140.06 | 5.75  | Alpha      |
| <b>000586F.g19.t1</b> | HIMADS24  | 000586F:511047:518658   | 1008     | 8        | +      | 335                     | 38534.19 | 8.84  | B(AP3-PI)  |
| <b>000238F.g55.t1</b> | HIMADS25  | 000238F:849739:851157   | 621      | 2        | +      | 206                     | 23333.47 | 6.08  | Alpha      |
| <b>001957F.g8.t1</b>  | HIMADS26  | 001957F:323596:325350   | 1338     | 2        | +      | 445                     | 48673.45 | 9.02  | Gamma      |
| <b>000887F.g29.t1</b> | HIMADS27  | 000887F:890609:891924   | 915      | 2        | +      | 304                     | 35110.43 | 5.25  | Beta       |
| <b>g39417.t1</b>      | HIMADS28  | 000628F:1010162:1017835 | 597      | 7        | -      | 198                     | 22484.65 | 8.94  | AGL6       |
| <b>g90065.t1</b>      | HIMADS29  | 002424F:490038:494465   | 435      | 3        | -      | 144                     | 17011.7  | 9.6   | C/D(AG)    |
| <b>g21585.t1</b>      | HIMADS30  | 000253F:1451643:1455810 | 597      | 4        | -      | 198                     | 23006.82 | 9.7   | C/D(AG)    |
| <b>g98509.t1</b>      | HIMADS31  | 002879F:359907:364430   | 531      | 6        | -      | 176                     | 20176.59 | 8.77  | AGL12      |
| <b>g57516.t1</b>      | HIMADS32  | 001131F:491536:499904   | 705      | 6        | -      | 234                     | 26967.13 | 9.91  | C/D(AG)    |
| <b>g120931.t1</b>     | HIMADS33  | 004517F:301077:304561   | 393      | 2        | +      | 130                     | 15020.97 | 10.25 | AGL6       |
| <b>g105746.t1</b>     | HIMADS34  | 003321F:169727:172210   | 630      | 2        | -      | 209                     | 22689.95 | 8.91  | Alpha      |
| <b>g126627.t1</b>     | HIMADS35  | 005050F:116796:119190   | 594      | 1        | +      | 197                     | 21541.38 | 7.71  | Alpha      |
| <b>g145841.t1</b>     | HIMADS36  | 008392F:89967:90690     | 585      | 1        | -      | 194                     | 22721.07 | 8.63  | Alpha      |
| <b>g115481.t1</b>     | HIMADS37  | 004059F:231977:232700   | 585      | 1        | -      | 194                     | 22663.03 | 8.84  | Alpha      |
| <b>g98489.t1</b>      | HIMADS38  | 002879F:155406:157810   | 627      | 1        | +      | 208                     | 22639.82 | 9.18  | Alpha      |
| <b>g70848.t1</b>      | HIMADS39  | 001574F:102007:103540   | 990      | 3        | -      | 329                     | 36408.27 | 9.79  | Alpha      |
| <b>g148256.t1</b>     | HIMADS40  | 009280F:58747:62590     | 867      | 4        | -      | 288                     | 31504.4  | 9.49  | Alpha      |
| <b>g63684.t1</b>      | HIMADS41  | 001329F:293116:295050   | 573      | 2        | +      | 190                     | 20693.75 | 9.61  | Alpha      |
| <b>g116966.t1</b>     | HIMADS42  | 004180F:181006:182210   | 960      | 2        | +      | 319                     | 35943.8  | 8.58  | Beta       |
| <b>g115485.t1</b>     | HIMADS43  | 004059F:341647:343290   | 1297     | 2        | -      | 431                     | 46701.58 | 9.36  | Alpha      |
| <b>g115484.t1</b>     | HIMADS44  | 004059F::322287:324440  | 1644     | 2        | -      | 547                     | 60026.5  | 9.46  | Alpha      |

|                |          |                         |      |   |   |     |          |      |       |
|----------------|----------|-------------------------|------|---|---|-----|----------|------|-------|
| g143617.t1     | HIMADS45 | 007779F:47307:48170     | 459  | 2 | - | 152 | 17620.07 | 9.69 | Alpha |
| g93707.t1      | HIMADS46 | 002616F:159796:160380   | 546  | 1 | + | 181 | 20710.51 | 9.26 | Alpha |
| g80284.t1      | HIMADS47 | 001966F:73257:73870     | 501  | 1 | - | 166 | 18423.71 | 5.68 | Alpha |
| g76680.t1      | HIMADS48 | 001803F:4107:5760       | 1266 | 3 | - | 421 | 45520.49 | 9.34 | Alpha |
| g149874.t1     | HIMADS49 | 010116F:52407:53990     | 597  | 2 | - | 198 | 22248.4  | 8.78 | Alpha |
| g93699.t1      | HIMADS50 | 002616F:17167:18630     | 672  | 1 | - | 223 | 25007.1  | 5.87 | Alpha |
| g149872.t1     | HIMADS51 | 010116F:46656:47370     | 498  | 2 | + | 165 | 18540.17 | 5.11 | Alpha |
| g17586.t1      | HIMADS52 | 000193F:209997:216980   | 474  | 2 | - | 157 | 18031.71 | 6.52 | Alpha |
| g140155.t1     | HIMADS53 | 007017F:101746:102480   | 546  | 1 | + | 181 | 20852.1  | 6.32 | Alpha |
| g69465.t1      | HIMADS54 | 001521F:226037:229000   | 555  | 2 | - | 184 | 20509.14 | 5.82 | Alpha |
| g132514.t1     | HIMADS55 | 005766F:205237:206360   | 723  | 2 | - | 240 | 27195.68 | 8.72 | Beta  |
| g123814.t1     | HIMADS56 | 004793F:82436:83690     | 987  | 2 | + | 328 | 36872.64 | 8.84 | Beta  |
| g37290.t1      | HIMADS57 | 000578F:1005602:1008466 | 1256 | 2 | + | 395 | 44459.12 | 9.34 | Beta  |
| g93696.t1      | HIMADS58 | 002616F:866:4050        | 708  | 3 | + | 235 | 26027.62 | 9.24 | Alpha |
| g20630.t1      | HIMADS59 | 000238F:870733:872867   | 759  | 2 | + | 252 | 28642.71 | 5.71 | Alpha |
| g71695.t1      | HIMADS60 | 001607F:395446:397250   | 591  | 2 | + | 196 | 22028.87 | 5.2  | Alpha |
| g34447.t1      | HIMADS61 | 000516F:40106:55690     | 1148 | 5 | + | 359 | 40443.46 | 8.84 | Alpha |
| g15081.t1      | HIMADS62 | 000156F:497105:498528   | 1100 | 3 | - | 343 | 39980.1  | 4.56 | Beta  |
| g110780.t1     | HIMADS63 | 003683F:338687:340750   | 664  | 1 | - | 220 | 25301.54 | 4.76 | Beta  |
| g32470.t1      | HIMADS64 | 000472F:1676:3320       | 1247 | 2 | + | 392 | 45421.25 | 4.55 | Beta  |
| 000453F.g47.t2 | HIMADS65 | 000453F:1097840:1106375 | 408  | 2 | - | 135 | 15911.6  | 9.69 | SOC   |

**Table S2.** RNA-seq libraries used to hints AUGUSTUS

| RNA-seq library | Tissues                                       |
|-----------------|-----------------------------------------------|
| SRR10589377     | Leaf, bract and lupulin glands                |
| SRR10549511     | Leaf, bract and lupulin glands                |
| SRR10541757     | Leaf, bract and lupulin glands                |
| SRR10320795     | Non-floral Cascade RNA-seq (stem)             |
| SRR10320793     | Meristem-Cascade                              |
| SRR10320791     | Leaf-Cascade                                  |
| SRR4242068      | Roots, sprouts, leaves, stems, flowers, cones |
| ERR2040411      | Young leaves                                  |

**Table S3.** Gene Ontology terms of hop MADS-box genes

| Genes    | GO terms                                                                                              |
|----------|-------------------------------------------------------------------------------------------------------|
| HIMADS02 | GO:0000977 GO:0000981 GO:0005634 GO:0008134 GO:0045944 GO:0046983                                     |
| HIMADS03 | GO:0000977 GO:0000981 GO:0005634 GO:0008134 GO:0045944 GO:0046983                                     |
| HIMADS04 | GO:0000977 GO:0003700 GO:0005634 GO:0045944 GO:0046983                                                |
| HIMADS05 | GO:0000977 GO:0003700 GO:0005634 GO:0045944 GO:0046983                                                |
| HIMADS06 | GO:0000977 GO:0000981 GO:0005634 GO:0008134 GO:0045944 GO:0046983                                     |
| HIMADS07 | GO:0000977 GO:0000981 GO:0005634 GO:0008134 GO:0045944 GO:0046983                                     |
| HIMADS08 | GO:0000977 GO:0000981 GO:0005634 GO:0008134 GO:0045944 GO:0046983                                     |
| HIMADS28 | GO:0000977 GO:0045944 GO:0046983                                                                      |
| HIMADS33 | GO:0000977 GO:0000981 GO:0005634 GO:0008134 GO:0010582 GO:0045944 GO:0046983                          |
| HIMADS01 | GO:0000977 GO:0000981 GO:0005634 GO:0008134 GO:0010228 GO:0045944 GO:0046983<br>GO:0048364            |
| HIMADS31 | GO:0000977 GO:0000981 GO:0005634 GO:0008134 GO:0010228 GO:0045944 GO:0046983<br>GO:0048364            |
| HIMADS11 | GO:0000977 GO:0000981 GO:0005634 GO:0008134 GO:0010582 GO:0045944 GO:0046983                          |
| HIMADS12 | GO:0000977 GO:0000981 GO:0005634 GO:0008134 GO:0010582 GO:0045944 GO:0046983                          |
| HIMADS13 | GO:0000977 GO:0003700 GO:0005634 GO:0045944 GO:0046983                                                |
| HIMADS24 | GO:0000977 GO:0003700 GO:0005634 GO:0045944 GO:0046983                                                |
| HIMADS29 | GO:0000977 GO:0000981 GO:0005634 GO:0008134 GO:0016020 GO:0045944 GO:0046983<br>GO:0048481 GO:0090376 |
| HIMADS30 | GO:0000977 GO:0003700 GO:0005634 GO:0045944 GO:0046983 GO:0090376                                     |

|          |                                                                                                                                                              |
|----------|--------------------------------------------------------------------------------------------------------------------------------------------------------------|
| HIMADS32 | GO:0000977 GO:0000981 GO:0005634 GO:0008134 GO:0045944 GO:0046983 GO:0090376                                                                                 |
| HIMADS19 | GO:0000977 GO:0003700 GO:0005634 GO:0045944 GO:0046983                                                                                                       |
| HIMADS20 | GO:0000977 GO:0003700 GO:0005634 GO:0045944 GO:0046983                                                                                                       |
| HIMADS09 | GO:0000977 GO:0003700 GO:0005634 GO:0045944 GO:0046983                                                                                                       |
| HIMADS10 | GO:0000977 GO:0003700 GO:0005634 GO:0045944 GO:0046983                                                                                                       |
| HIMADS18 | GO:0000977 GO:0003700 GO:0005634 GO:0045944 GO:0046983                                                                                                       |
| HIMADS15 | GO:0000977 GO:0003700 GO:0005634 GO:0008360 GO:0045595 GO:0045944 GO:0046983<br>GO:0048316 GO:0051302 GO:0080060 GO:0080155 GO:2000029                       |
| HIMADS16 | GO:0000977 GO:0003700 GO:0005634 GO:0045944 GO:0046983                                                                                                       |
| HIMADS17 | GO:0000977 GO:0003700 GO:0005634 GO:0045944 GO:0046983                                                                                                       |
| HIMADS65 | GO:0000977 GO:0000981 GO:0005634 GO:0008134 GO:0010048 GO:0032501 GO:0045944<br>GO:0046983 GO:0048510                                                        |
| HIMADS14 | GO:0003677 GO:0046983                                                                                                                                        |
| HIMADS22 | GO:0000981 GO:0000987 GO:0045944 GO:0046983                                                                                                                  |
| HIMADS23 | GO:0000977 GO:0000981 GO:0005634 GO:0008134 GO:0045944 GO:0046983 GO:0048481                                                                                 |
| HIMADS25 | GO:0000977 GO:0000981 GO:0005634 GO:0006357 GO:0008134 GO:0046983                                                                                            |
| HIMADS34 | GO:0000977 GO:0000981 GO:0005634 GO:0008134 GO:0045944 GO:0046983                                                                                            |
| HIMADS35 | GO:0000977 GO:0000981 GO:0005634 GO:0008134 GO:0045944 GO:0046983                                                                                            |
| HIMADS36 | GO:0000977 GO:0045944 GO:0046983                                                                                                                             |
| HIMADS37 | GO:0000977 GO:0045944 GO:0046983                                                                                                                             |
| HIMADS38 | GO:0000977 GO:0000981 GO:0005634 GO:0008134 GO:0046983                                                                                                       |
| HIMADS39 | GO:0000977 GO:0000981 GO:0005634 GO:0008134 GO:0045944 GO:0046983                                                                                            |
| HIMADS40 | GO:0000977 GO:0000981 GO:0005634 GO:0008134 GO:0045944 GO:0046983                                                                                            |
| HIMADS41 | GO:0000977 GO:0000981 GO:0005634 GO:0008134 GO:0045944 GO:0046983                                                                                            |
| HIMADS43 | GO:0000977 GO:0000981 GO:0005634 GO:0006357 GO:0008134 GO:0046983                                                                                            |
| HIMADS44 | GO:0000977 GO:0000981 GO:0005634 GO:0008134 GO:0045944 GO:0046983                                                                                            |
| HIMADS45 | GO:0000977 GO:0000981 GO:0005634 GO:0008134 GO:0045944 GO:0046983                                                                                            |
| HIMADS46 | GO:0000977 GO:0000981 GO:0005634 GO:0008134 GO:0045944 GO:0046983                                                                                            |
| HIMADS47 | GO:0000977 GO:0000981 GO:0005634 GO:0008134 GO:0045944 GO:0046983                                                                                            |
| HIMADS48 | GO:0000977 GO:0000981 GO:0005634 GO:0006357 GO:0008134 GO:0046983                                                                                            |
| HIMADS49 | GO:0000977 GO:0000981 GO:0005634 GO:0008134 GO:0045944 GO:0046983                                                                                            |
| HIMADS50 | GO:0000976 GO:0046983                                                                                                                                        |
| HIMADS51 | GO:0000976 GO:0046983                                                                                                                                        |
| HIMADS52 | GO:0000976 GO:0046983                                                                                                                                        |
| HIMADS53 | GO:0000977 GO:0000981 GO:0005634 GO:0006357 GO:0008134 GO:0046983                                                                                            |
| HIMADS54 | GO:0000977 GO:0000981 GO:0005634 GO:0006357 GO:0008134 GO:0046983                                                                                            |
| HIMADS58 | GO:0000977 GO:0005634 GO:0045944 GO:0046983                                                                                                                  |
| HIMADS59 | GO:0000976 GO:0046983                                                                                                                                        |
| HIMADS60 | GO:0000977 GO:0000981 GO:0005634 GO:0008134 GO:0046983                                                                                                       |
| HIMADS61 | GO:0000977 GO:0000981 GO:0005634 GO:0006357 GO:0008134 GO:0046983                                                                                            |
| HIMADS26 | GO:0000977 GO:0000981 GO:0000987 GO:0005634 GO:0008134 GO:0045944 GO:0046983                                                                                 |
| HIMADS21 | GO:0000981 GO:0000987 GO:0045944 GO:0046983                                                                                                                  |
| HIMADS27 | GO:0003677 GO:0046983                                                                                                                                        |
| HIMADS42 | GO:0000977 GO:0000981 GO:0000987 GO:0005634 GO:0008134 GO:0008360 GO:0045595<br>GO:0045944 GO:0046983 GO:0048316 GO:0051302 GO:0080060 GO:0080155 GO:2000029 |
| HIMADS55 | GO:0003677 GO:0046983                                                                                                                                        |
| HIMADS56 | GO:0003677 GO:0046983                                                                                                                                        |
| HIMADS57 | GO:0003677 GO:0046983                                                                                                                                        |
| HIMADS62 | GO:0003677 GO:0046983                                                                                                                                        |
| HIMADS63 | GO:0003677 GO:0046983                                                                                                                                        |
| HIMADS64 | GO:0003677 GO:0046983                                                                                                                                        |

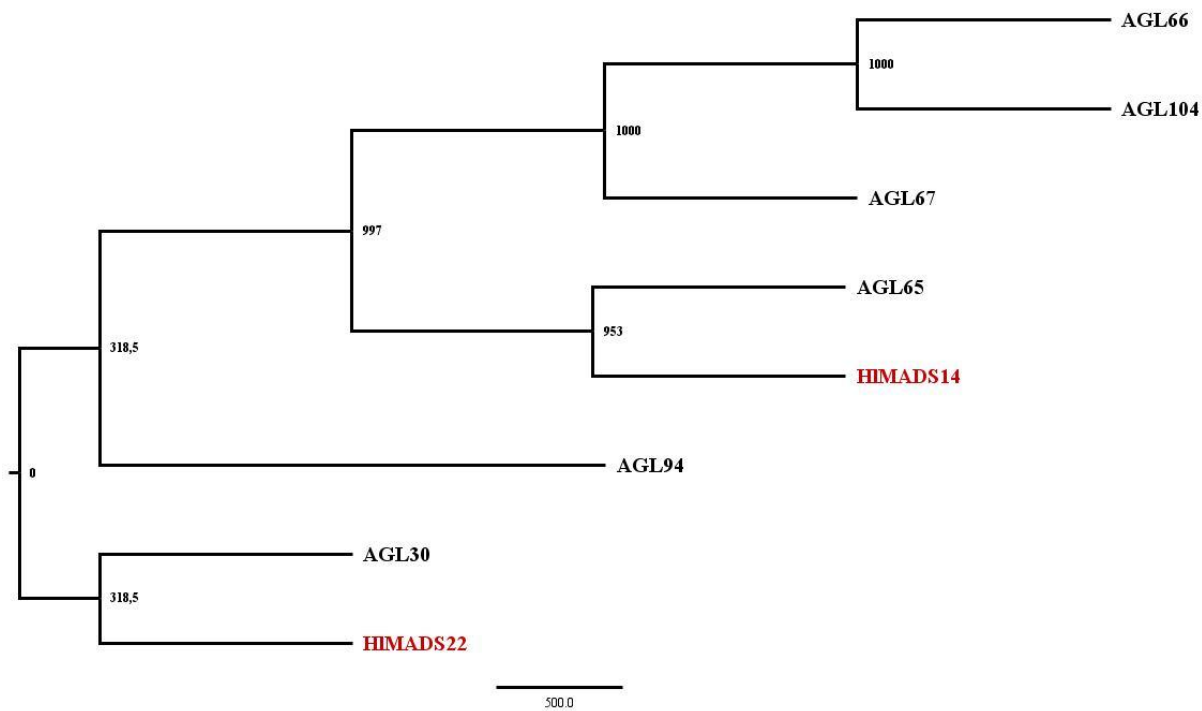

**Figure S1.** Phylogenetic tree of MIKC\*-type MADS-box proteins of *H. lupulus* (2, red), *Arabidopsis* (6).

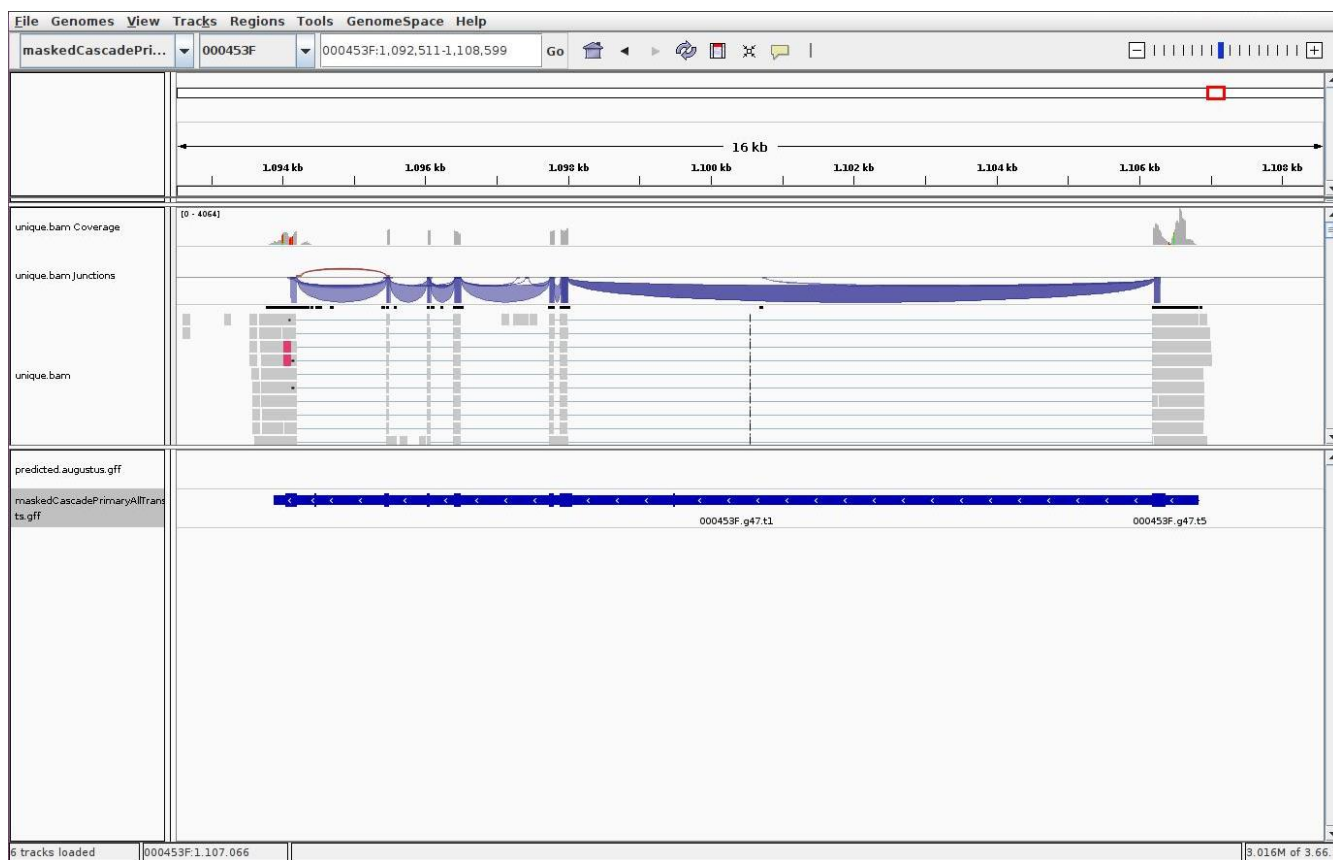

**Figure S2.** RNAseq reads on the gene 000453F.g47.

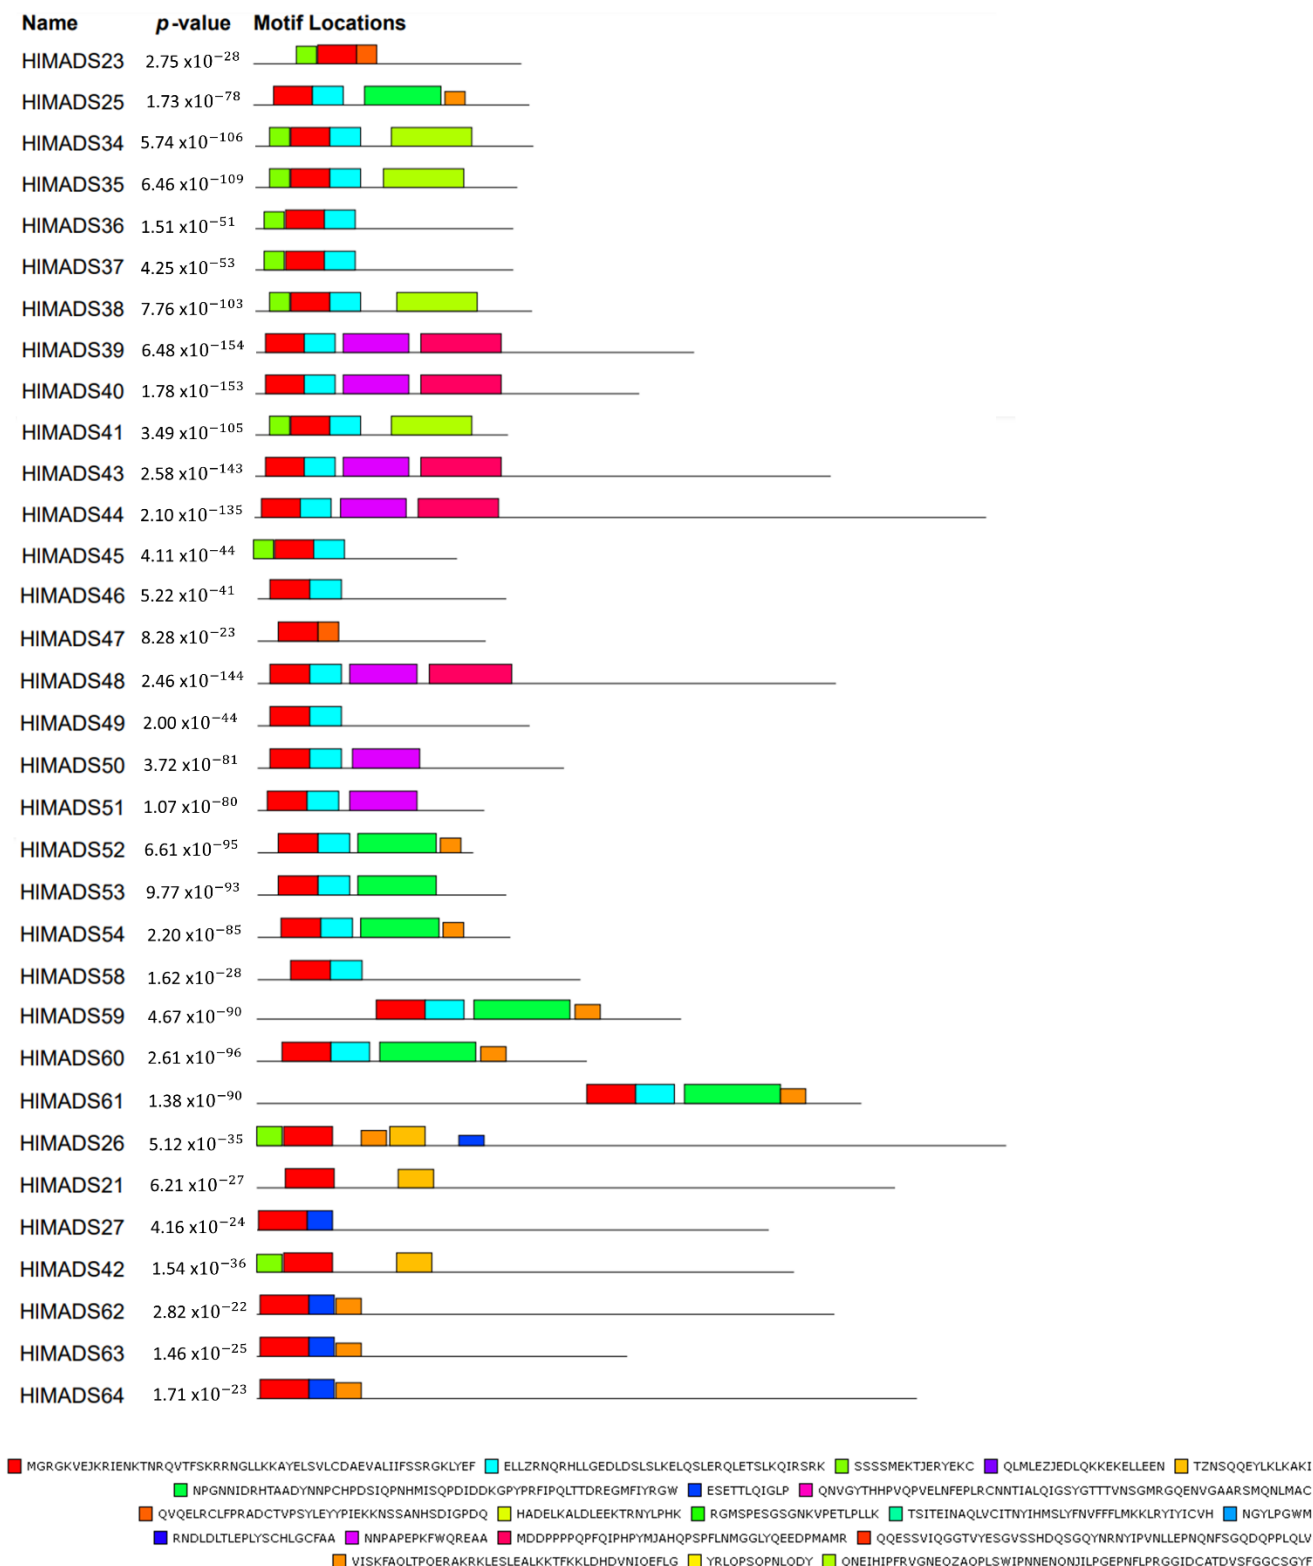

**Figure S3.** Motifs distribution of the hop MADS-box proteins. Protein sequences are represented by black lines, and the conserved motifs are represented by colored boxes. The motif consensus sequences are shown in the legend.

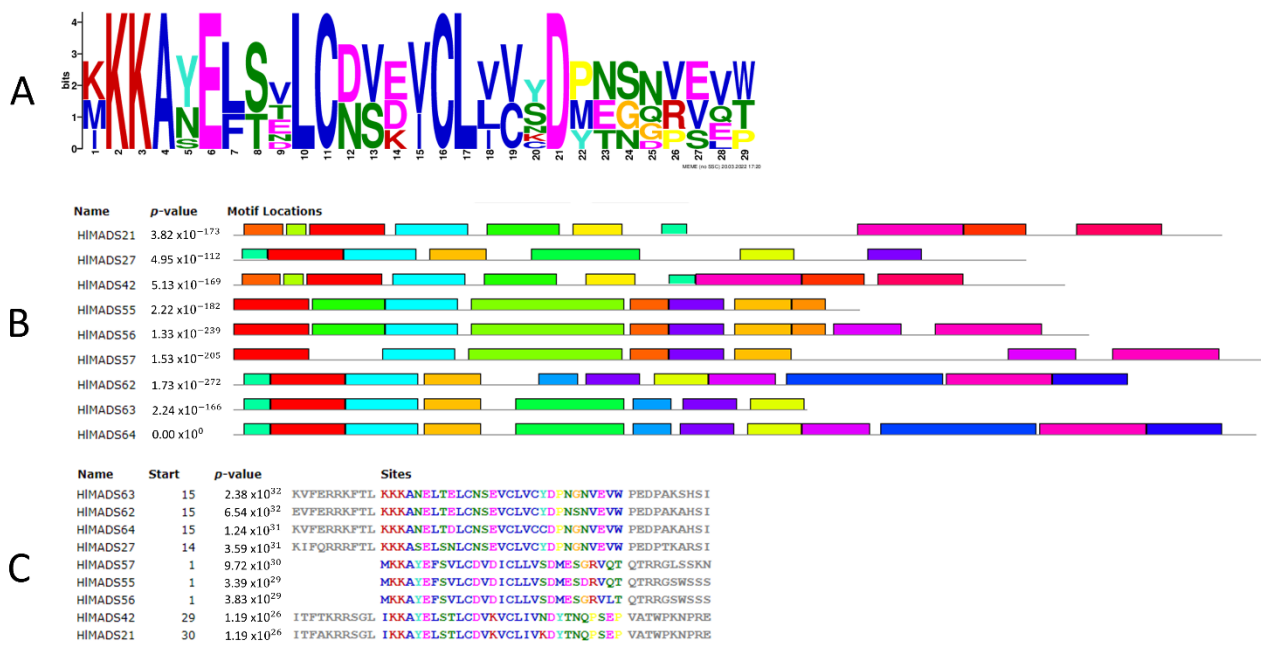

**Figure S4.** Motifs distribution of the hop MADS-box proteins of  $\beta$ -subfamily members. Protein sequences are represented by black lines, and the conserved motifs are represented by colored boxes. **A:** Logo of MADS-box domain. **B:** Motifs distribution of the hop MADS-box proteins of  $\beta$ -subfamily members. **C:** Amino acid residue sequences of selected MADS-box domains.

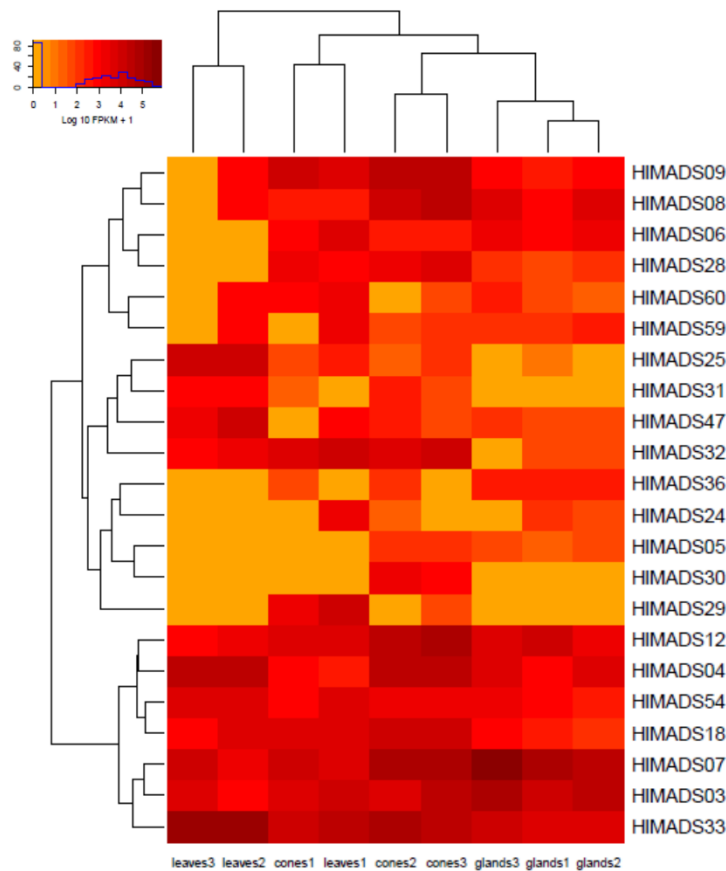

**Figure S5.** Expression profile of the hop MADS-box genes in three RNAseq libraries from cones, leaves, and glands.

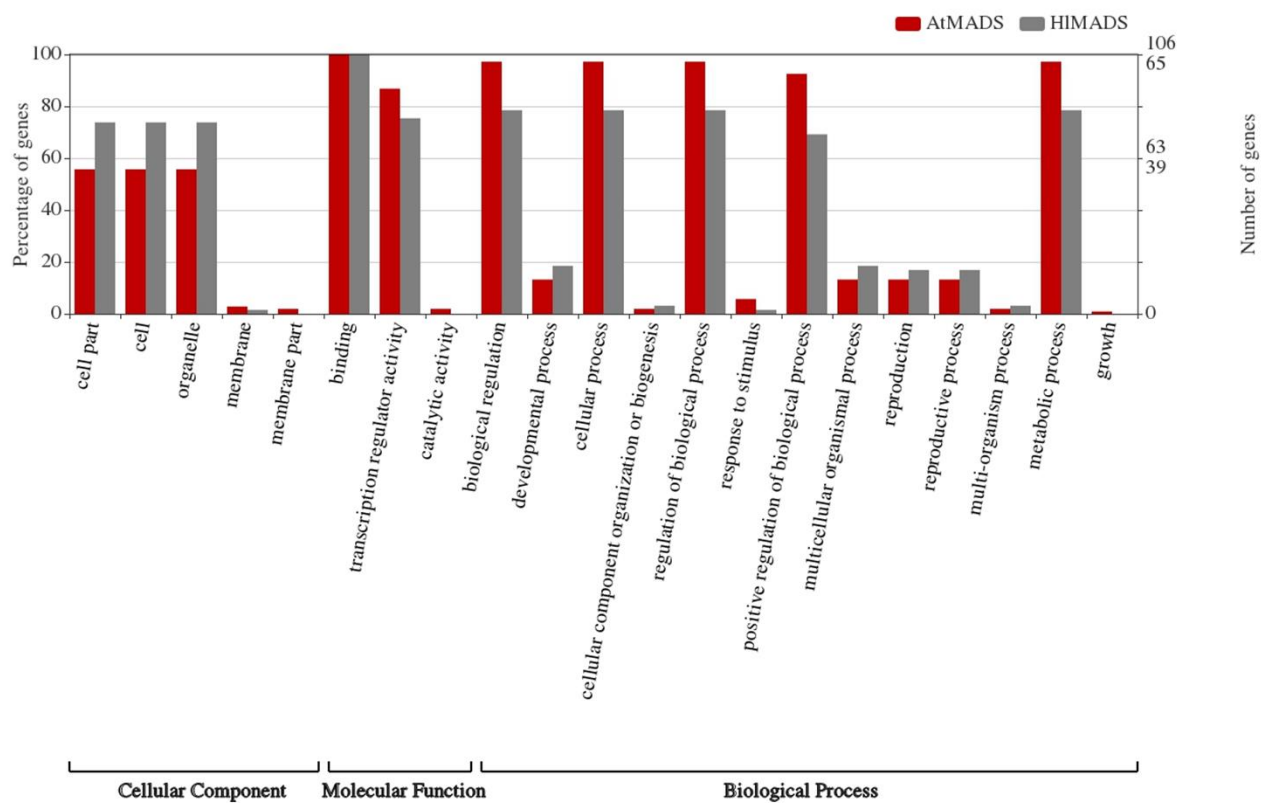

**Figure S6.** Gene Ontology classification of MADS-box genes in hop and *Arabidopsis*.

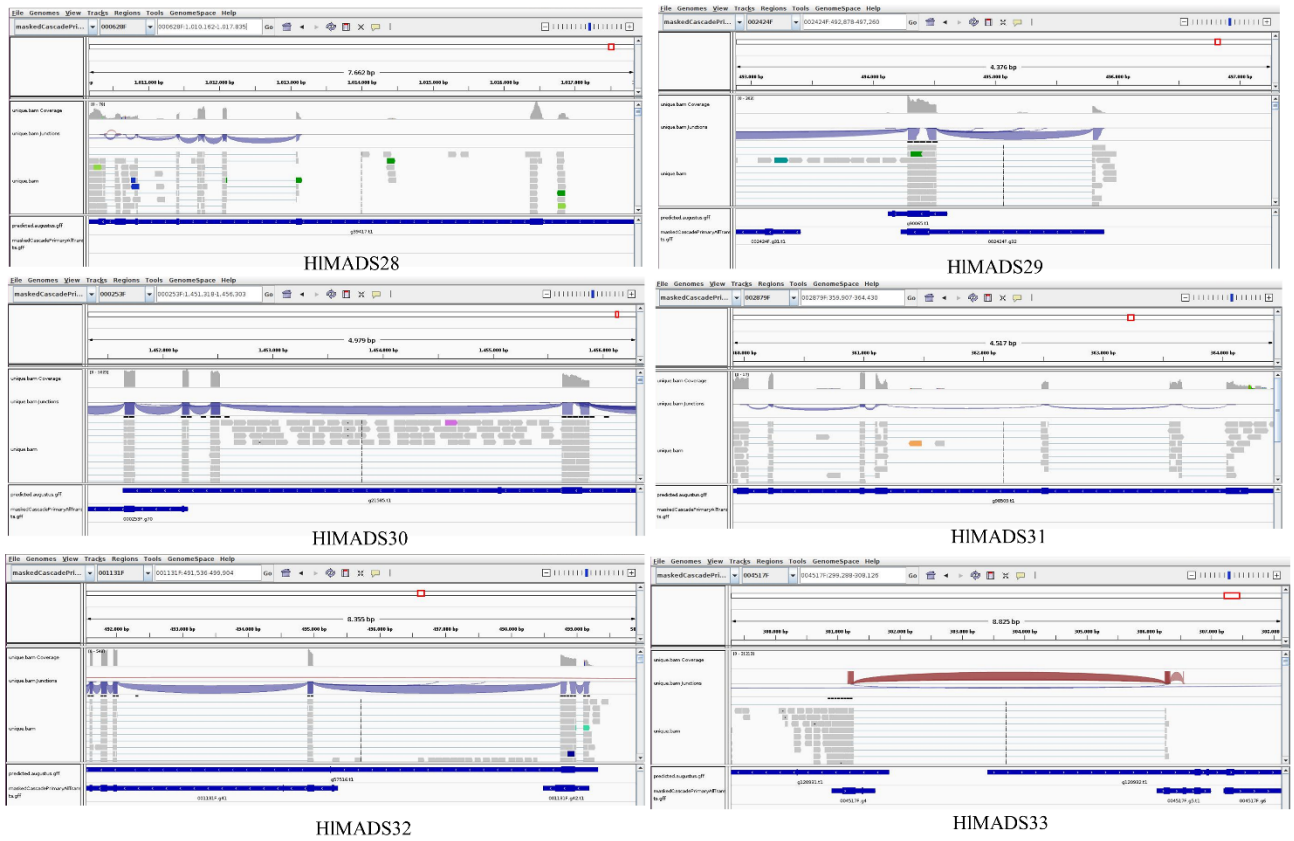

**Figure S7.** RNAseq reads that are uniquely mapped on 6 novel MADS-box genes (*HIMADS28-33*).
